# Supplementary material for: Long Non-Coding RNAs and Their “Discrete” Contribution to IBD and Johne’s Disease—What Stands out in the Current Picture? A Comprehensive Review
Source: MDPI journal article supplement (doi:10.3390/ijms241713566), 2023-09-01
Supplement: s1 [file s1]

# Long Non-Coding RNAs and Their “Discrete” Contribution to IBD and Johne’s Disease—What Stands Out in the Current Picture? A Comprehensive Review

Kostas A. Triantaphyllopoulos

Department of Biotechnology, School of Applied Biology and Biotechnology, Agricultural University of Athens, 75 Iera Odos St., 11855 Athens, Greece; ktrianta@aua.gr

| TABLE OF CONTENTS                           | page |
|---------------------------------------------|------|
| <b>Tables</b>                               |      |
| Table S1.....                               | 2    |
| Table S2.....                               | 4    |
| <b>Figures</b>                              |      |
| Figure S1(A-B).....                         | 6    |
| Figure S1(C-D).....                         | 8    |
| <b>ncFANdb 3.0 network input data</b> ..... | 9    |

## TABLES

**Table S1.** Expression Profile of known or novel, uncategorized RNAs in Crohn’s disease, identified by Microarray GEO datasets (GSE75459, NCBI)

| SEQUENCE NAME                                                                                                   | TRANSCRIPT_<br>TYPE | log2(F<br>C) | log10(Pval<br>ue) | ACCESSION                                                                                                            | LENGTH (bp)                                                | DESCRIPTION                                                                                                                                                                                                                                                                                                                                                             |
|-----------------------------------------------------------------------------------------------------------------|---------------------|--------------|-------------------|----------------------------------------------------------------------------------------------------------------------|------------------------------------------------------------|-------------------------------------------------------------------------------------------------------------------------------------------------------------------------------------------------------------------------------------------------------------------------------------------------------------------------------------------------------------------------|
| <b>UPREGULATED</b>                                                                                              |                     |              |                   |                                                                                                                      |                                                            |                                                                                                                                                                                                                                                                                                                                                                         |
| GUSBP 16, 3, 15,14<br>TCONS_00021811,<br>TCONS_00021810,<br>TCONS_00021809,<br>CONS_00021807,<br>LOC100505918   | noncoding           | 9.291        | 11.749            | NR_146391.1, NR_027386.2, NR_034021.1,<br>NR_029426.1                                                                | 2383, 1551, 1759,<br>1943                                  | Homo sapiens GUSB pseudogene (GUSBP),<br>non-coding RNA                                                                                                                                                                                                                                                                                                                 |
| LOC105375855,TCONS_002<br>50763,<br>TCONS_00250762                                                              | noncoding           | 8.796        | 15.509            | OA985557.1,OA985556.1,OA985555.1,<br>OA985554.1, NR_037851.1                                                         | 2195, 2291, 2214,<br>1897,<br>2442                         | Homo sapiens for PREDICTED lncRNAs<br>(TCONS_00021811, TCONS_00021810,<br>TCONS_00021809, TCONS_00021807)<br>Homo sapiens uncharacterized LOC100505918,<br>long non-coding RNA<br>Homo sapiens uncharacterized LOC105375855<br>(LOC105375855), ncRNA                                                                                                                    |
| TCONS_00021999,<br>TCONS_00021998,<br>TCONS_00021997, GAS5-<br>AS1                                              | noncoding           | 8.011        | 3.438             | XR_928920.2, OA989059.1, OA989058.1                                                                                  | 7758, 1493, 2830                                           | Homo sapiens lncRNA for PREDICTED<br>lncRNA (TCONS_00250763)<br>Homo sapiens lncRNA for PREDICTED<br>lncRNA (TCONS_00250762)                                                                                                                                                                                                                                            |
| FIGNL2-DT                                                                                                       | noncoding           | 7.888        | 12.07             | OA985569.1, OA985568.1, OA985567.1,<br>NR_037605.1                                                                   | 5143, 5706, 5182,<br>702                                   | Homo sapiens lncRNA for PREDICTED<br>lncRNA (TCONS_00021999)<br>Homo sapiens lncRNA for PREDICTED<br>lncRNA (TCONS_00021998)<br>Homo sapiens lncRNA for PREDICTED<br>lncRNA (TCONS_00021997)<br>Homo sapiens GAS5 antisense RNA 1 (GAS5-<br>AS1), LncRNA                                                                                                                |
|                                                                                                                 | noncoding           | 7.617        | 11.635            | NR_135803.1                                                                                                          | 427                                                        | Homo sapiens FIGNL2 divergent transcript<br>(FIGNL2-DT), LncRNA                                                                                                                                                                                                                                                                                                         |
| <b>DOWNREGULATED</b>                                                                                            |                     |              |                   |                                                                                                                      |                                                            |                                                                                                                                                                                                                                                                                                                                                                         |
| MK280060, lncAB107.3,<br>LHRI_LNC1843.10,<br>LHRI_LNC1843.3,LHRI_LN<br>C1843.6, TALAM1,<br>MALAT1 var3, 2 and 1 | noncoding           | -8.91        | 13.635            | MK280060.1, MK280059.1, MN297067.1,<br>MN297066.1, MN297065.1, NR_145459.1,<br>NR_144568.1, NR_144567.1, NR_002819.4 | 6539, 3541, 3924,<br>4787, 4452, 8121,<br>8302, 8545, 8779 | Homo sapiens gb MK280060 lncRNA gene,<br>complete sequence,<br>Homo sapiens lncAB107.3 lncRNA gene,<br>complete sequence,<br>Homo sapiens LHRI_LNC1843.10 lncRNA<br>gene, complete sequence,<br>Homo sapiens LHRI_LNC1843.3 lncRNA gene,<br>complete sequence,<br>Homo sapiens arachidonate 12-lipoxygenase<br>pseudogene 2 (ALOX12P2), transcript variant 2,<br>ncRNA, |
| ALOX12P2 var2, ALOX12P2<br>var1,<br>ALOX12E                                                                     | noncoding           | -8.223       | 10.631            | NR_120453.1, NR_002710.2, mRNA<br>AF020774.1                                                                         | 2230, 2768, 2208                                           | Homo sapiens arachidonate 12-lipoxygenase<br>pseudogene 2 (ALOX12P2), transcript variant 1,<br>ncRNA,<br>Homo sapiens hair and skin epidermal-type 12-                                                                                                                                                                                                                  |

|                                       |           |        |        |                                       |                |                                                                                                                                                                                                                                                                     |
|---------------------------------------|-----------|--------|--------|---------------------------------------|----------------|---------------------------------------------------------------------------------------------------------------------------------------------------------------------------------------------------------------------------------------------------------------------|
|                                       |           |        |        |                                       |                | lipoxxygenase-relat                                                                                                                                                                                                                                                 |
| LOC440300, GOLGA2P8                   | noncoding | -7.705 | 13.386 | NR_033738.1, NG_023539.1              | 7771, 7676     | Homo sapiens chondroitin sulfate proteoglycan 4 pseudogene (LOC440300), non-coding RNA<br>Homo sapiens GOLGA2 pseudogene 8 (GOLGA2P8) on chromosome 1                                                                                                               |
| TRIM52 var2, TRIM52 var3, TRIM52 var1 | noncoding | -7.432 | 13.399 | NR_102760.1, NR_102761.1, NR_102759.1 | 851, 828, 1113 | Homo sapiens TRIM52 antisense RNA 1 (head to head) (TRIM52-AS1), transcript variant 2, lncRNA,<br>Homo sapiens TRIM52 antisense RNA 1 (head to head) (TRIM52-AS1), transcript variant 3, lncRNA,<br>Homo sapiens TRIM52 antisense RNA 1 (head to head) (TRIM52-AS1) |
| TRIM52 var2, TRIM52 var3, TRIM52 var1 | noncoding | -7.089 | 13.274 | NR_102760.1, NR_102761.1, NR_102759.1 | 851, 828, 1113 | Homo sapiens TRIM52 antisense RNA 1 (head to head) (TRIM52-AS1), transcript variant 2, lncRNA,<br>Homo sapiens TRIM52 antisense RNA 1 (head to head) (TRIM52-AS1), transcript variant 3, lncRNA.<br>Homo sapiens TRIM52 antisense RNA 1 (head to head) (TRIM52-AS1) |

**Appendix:** In light brown highlight are categorised the protein coding genes, without highlight are shown the noncoding transcripts, Downregulated, Upregulated, transcripts or genes in Crohn's disease versus normal (control group). **Platform GPL16956.** GSE75459 dataset, Agilent-045997 Arraystar human lncRNA microarray V3 (Probe Name Version) Agilent Technologies. The sequences and the names correspond to the order of the accession numbers, the accession lengths and the description in the table. Analysis was performed by GEO2R script (GEO, NCBI) as described in the text. The protein coding genes are highlighted in brown colour and the noncoding RNAs with no colour. log2(FC): Log2 fold change in a logarithmic scale of gene expression levels. -log10(Pvalue): log10 p value represents the level of significance of a gene or trait, showing the significance of fold-changes that deviate more strongly from zero. Protein coding RNAs (mRNAs) are not shown.

**Table S2.** Regulatory relationship between human lncRNAs and DNA methylation involved in Ulcerative Colitis.

| TranscriptID      | Transcript Name | Element type | Start        | End          | Disease Name                                                     | Resource | Technology | Status           | Regulatory mechanism   |
|-------------------|-----------------|--------------|--------------|--------------|------------------------------------------------------------------|----------|------------|------------------|------------------------|
| ENST00000512369.1 | DAPP1-002       | 5'UTR        | 9981684<br>6 | 9981691<br>3 | Breast invasive carcinoma                                        | TCGA     | HM450k     | hypomethylation  | Cis-Methylated LncRNAs |
| ENST00000512369.1 | DAPP1-002       | 5'UTR        | 9981684<br>6 | 9981691<br>3 | Cervical squamous cell carcinoma and endocervical adenocarcinoma | TCGA     | HM450k     | hypomethylation  | Cis-Methylated LncRNAs |
| ENST00000512369.1 | DAPP1-002       | 5'UTR        | 9981684<br>6 | 9981691<br>3 | Breast cancer                                                    | GSE60185 | HM450k     | hypomethylation  | Cis-Methylated LncRNAs |
| ENST00000512369.1 | DAPP1-002       | 5'UTR        | 9981684<br>6 | 9981691<br>3 | Pancreatic ductal adenocarcinoma                                 | GSE49149 | HM450k     | hypomethylation  | Cis-Methylated LncRNAs |
| ENST00000512369.1 | DAPP1-002       | 5'UTR        | 9981684<br>6 | 9981691<br>3 | Prostate carcinoma                                               | GSE34340 | HM450k     | hypermethylation | Cis-Methylated LncRNAs |
| ENST00000512369.1 | DAPP1-002       | 5'UTR        | 9981684<br>6 | 9981691<br>3 | Prostate cancer                                                  | GSE62053 | HM450k     | hypomethylation  | Cis-Methylated LncRNAs |
| ENST00000512369.1 | DAPP1-002       | 5'UTR        | 9981684<br>6 | 9981691<br>3 | Ulcerative colitis                                               | GSE32146 | HM450k     | hypomethylation  | Cis-Methylated LncRNAs |
| ENST00000512369.1 | DAPP1-002       | 5'UTR        | 9981684<br>6 | 9981691<br>3 | Colon adenoma                                                    | GSE48684 | HM450k     | hypomethylation  | Cis-Methylated LncRNAs |
| ENST00000512369.1 | DAPP1-002       | 5'UTR        | 9981684<br>6 | 9981691<br>3 | Bipolar disorder and iron deficiency (lung)                      | ENCODE   | WGBS       | hypermethylation | Cis-Methylated LncRNAs |
| ENST00000512369.1 | DAPP1-002       | 5'UTR        | 9981684<br>6 | 9981691<br>3 | Hepatocellular carcinoma                                         | ENCODE   | WGBS       | hypomethylation  | Cis-Methylated LncRNAs |
| ENST00000512369.1 | DAPP1-002       | 5'UTR        | 9981684<br>6 | 9981691<br>3 | Colon adenocarcinoma                                             | TCGA     | WGBS       | hypomethylation  | Cis-Methylated LncRNAs |
| ENST00000512369.1 | DAPP1-002       | 5'UTR        | 9981684<br>6 | 9981691<br>3 | Breast invasive carcinoma                                        | TCGA     | WGBS       | hypomethylation  | Cis-Methylated LncRNAs |
| ENST00000512369.1 | DAPP1-002       | 5'UTR        | 9981684<br>6 | 9981691<br>3 | Lung adenocarcinoma                                              | TCGA     | WGBS       | hypomethylation  | Cis-Methylated LncRNAs |

|                    |           |                 |          |          |                            |          |        |                  |                                  |
|--------------------|-----------|-----------------|----------|----------|----------------------------|----------|--------|------------------|----------------------------------|
| ENST00000512369.1  | DAPP1-002 | 5'UTR           | 99816846 | 99816913 | Stomach adenocarcinoma     | TCGA     | WGBS   | hypermethylation | Cis-Methylated LncRNAs           |
| ENST00000296414.10 | DAPP1-001 | 5'UTR           | 99816833 | 99816913 | Ulcerative colitis         | GSE32146 | HM450k | hypomethylation  | Cis-Methylated LncRNAs           |
| ENST00000512369.1  | DAPP1-002 | 5'UTR           | 99816846 | 99816913 | Ulcerative colitis         | GSE32146 | HM450k | hypomethylation  | Cis-Methylated LncRNAs           |
| ENST00000296414.10 | DAPP1-001 | 1_exon          | 99816833 | 99817014 | Ulcerative colitis         | GSE32146 | HM450k | hypomethylation  | Cis-Methylated LncRNAs           |
| ENST00000512369.1  | DAPP1-002 | 1_exon          | 99816846 | 99817014 | Ulcerative colitis         | GSE32146 | HM450k | hypomethylation  | Cis-Methylated LncRNAs           |
| ENST00000296414.10 | DAPP1-001 | TSS200          | 99816633 | 99816832 | Ulcerative colitis         | GSE32146 | HM450k | hypomethylation  | Cis-Methylated LncRNAs           |
| ENST00000512369.1  | DAPP1-002 | TSS200          | 99816646 | 99816845 | Ulcerative colitis         | GSE32146 | HM450k | hypomethylation  | Cis-Methylated LncRNAs           |
| ENST00000534336.2  | MALA T1   | TERC promoter   |          |          | Liver Cancer               |          |        | hypomethylation  | Trans-Methylation Due to LncRNAs |
| ENST00000534336.2  | MALA T1   | MALAT1 promoter |          |          | Non-Small Cell Lung Cancer |          |        | hypomethylation  | Cis-Methylated LncRNAs           |

Note: TCGA: Cancer Genome Atlas, WGBS: Wide-genome Bisulfite sequencing, TSS: transcription start site. Evidence provided by: Lnc2Meth database, a manually curated database of regulatory relationships between lncRNAs and DNA methylation associated with human disease (see text). The methylation status of UC pathology is concerning the associated dual adaptor of phosphotyrosine and 3-phosphoinositides 1 (DAPP1) gene. DAPP1 is in genomic location: chr4:99,816,827-99,872,333, 4q23. Ensembl: ENSG00000070190, UniProt: Q9UN19. 5'UTR: 5' untranslated region, TSS200: gene region 200 bp downstream of transcription start site. 1\_exon: 1<sup>st</sup> exon. The analysis platform used was HM450k Illumina Infinium 450k DNA methylation array, WGBS: whole-genome bisulfite sequencing.

## FIGURES

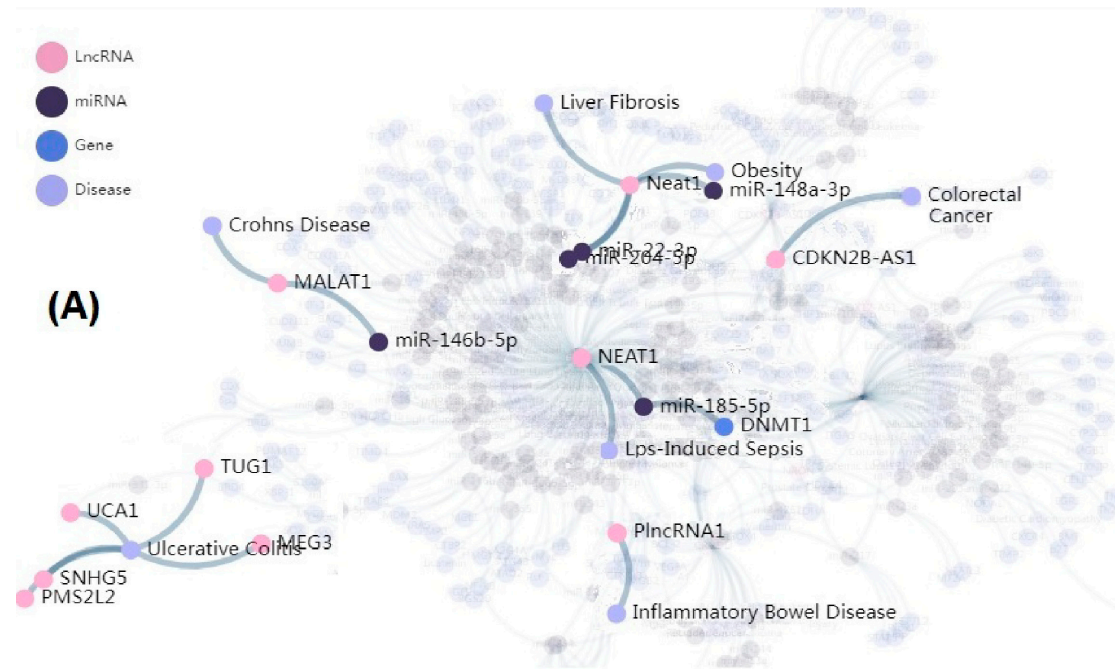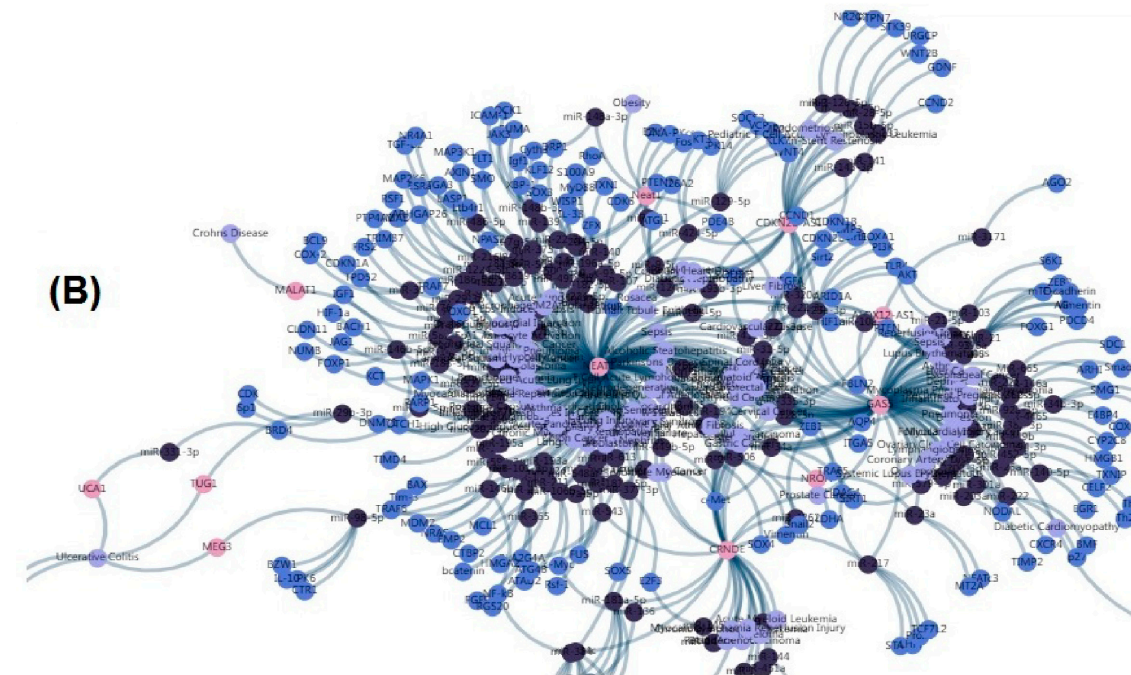

**Figure S1.** (A) LncRNA-gene-miRNA-disease network created in LncACTdb 3.0 database from human data, showing in this layer significant published targets for IBD in humans. (B) The full image shows the dense network with overlapping nodes, as calculated and visualized by the database visualization tool (details are described in the text).







## **LncACT-Network tool settings and input genes used in LncACTdb 3.0 database.**

### **Figure S1(A) and S1(B)**

**The input symbol/Ensembl IDs for the human IBD-related pathologies that were used in the LncACTdb 3.0 database for the analysis were the following:**

**lncRNA symbol/Ensembl ID:** ALOX12-AS1, CDKN2B-AS1, CRNDE, GAS5, NRON, NEAT1

**mRNA symbol/Ensembl ID:** BAG4, GALNT10, EZH2, NFAT, STAT3

**miRNAs:** miR-495, miR-106b, miR-10b, miR-143-3p, miR-34a, let-7a

**Diseases:** Crohn's Disease, Inflammatory Bowel Disease, Ulcerative Colitis

### **Figure S 1(C) and S1(D)**

**The input symbol/Ensembl IDs for cattle infected with MAP used in the LncACTdb 3.0 database for the analysis were:**

**lncRNA symbol/Ensembl ID:** ADNCR, DANCR, MEG3, MEG8, miR221 sponge, H19

**mRNA symbol/Ensembl ID:** YY1, Igf2, TSPAN3, ATXN7, Cdc42, ZFX

**miRNAs:** miR-204, miR-135b, miR-424, miR-127-3p, miR-136, miR-222

**Diseases:** Tuberculosis, Crohn's Disease
